# Supplementary material for: Aluminum-doped cadmium sulfide homojunction photoelectrode with optimal film quality and water-splitting performance
Source: Royal Society of Chemistry journal article supplement (doi:10.1039/d2cy02136f), 2023-01-01
Supplement: d2cy02136f1.pdf [file d2cy02136f1.pdf]

*Supporting Information*

# **Aluminium-doped cadmium sulfide homojunction photoelectrode with optimal film quality and water-splitting performance**

**Jiangwei Zhang<sup>12#</sup>, Fei Yu<sup>2#</sup>, He Yu<sup>2</sup>, Shuhui Yang<sup>13</sup>, Gaotian Zhang<sup>2</sup>, Feng Jiang<sup>1</sup>,  
Menglong Zhang<sup>2\*</sup> and Dongxiang Luo<sup>1\*</sup>**

<sup>1</sup>School of Chemistry and Chemical Engineering/Institute of Clean Energy and Materials/Guangzhou Key Laboratory for Clean Energy and Materials/Huangpu Hydrogen Innovation Center, Guangzhou University, Guangzhou 510006, PR China

<sup>2</sup>Institute of Hydrogen Energy for Carbon Peaking and Carbon Neutralization, School of Semiconductor Science and Technology, South China Normal University, Foshan, 528225, China

<sup>3</sup>Institut des Nanosciences de Paris (INSP), Faculty of Science&Engineering, Sorbonne University, place Jussieu, Paris, 75005, France

Corresponding author

*E-mail address: mlzhang@m.scnu.edu.cn (Menglong Zhang) and luodx@gdut.edu.cn (Dongxiang Luo)*

## Equations related in this work

### 1. Theoretical maximum photocurrent density ( $J_{\text{abs}}$ )

Theoretical maximum photocurrent density ( $J_{\text{abs}}$ ) is the photocurrent density assuming that all absorbed photons can be converted into current (i.e., APCE = IPCE/LHE = 100%), it is a constant with the AM 1.5G spectrum and the light harvesting efficiency of the fixed photoelectrode. In the case of  $J_{\text{abs}}$ , it can be calculated according to the following equation:

$$J_{\text{abs}} = \int_{\lambda_1}^{\lambda_2} \frac{\lambda \times \text{LHE}(\lambda) \times P(\lambda)}{1240} d(\lambda) \quad \text{Eq. S1}$$

S1

where  $\lambda$  and  $P(\lambda)$  are the light wavelength (nm) and the corresponding power density ( $\text{mW cm}^{-2} \text{ nm}^{-1}$ ) for the standard solar spectrum AM 1.5G (ASTMG-173-03), respectively.  $\text{LHE}(\lambda)$  is light absorption efficiency. The integrated power ( $\text{W}\cdot\text{m}^{-2}$ ) was then divided by 1.23 V vs. RHE to convert it (Figure S6).<sup>1</sup>

### 2. The charge separation efficiency ( $\eta_{\text{sep}}$ ) and charge injection efficiency ( $\eta_{\text{inj}}$ )

Photocurrent density arising from PEC water oxidation can be described by the following equation:

$$J_{\text{H}_2\text{O}} = J_{\text{abs}} \times \eta_{\text{sep}} \times \eta_{\text{inj}} \quad \text{Eq. S2}$$

Eq. S2

$\eta_{\text{sep}}$  is the ratio of photogenerated holes which have migrated to the semiconductor/electrolyte interfaces, and  $\eta_{\text{inj}}$  is the ratio of photogenerated holes participated in water oxidation reaction. In this work, the widely used  $\text{Na}_2\text{S}/\text{Na}_2\text{SO}_3$  was chosen as the hole scavenger.<sup>2</sup>  $\eta_{\text{sep}}$  and  $\eta_{\text{inj}}$  were calculated according to the Eq.S3 and Eq. S4, respectively :

$$\eta_{\text{sep}} = \frac{J_{\text{Na}_2\text{S}/\text{Na}_2\text{SO}_3}}{J_{\text{abs}}} \quad \text{Eq. S3}$$

S3

$$\eta_{inj} = \frac{J_{H_2O}}{J_{Na_2S/Na_2SO_3}}$$

Eq.

S4

$J_{Na_2S/Na_2SO_3}$  and  $J_{H_2O}$  are the photocurrent densities measured with aqueous (0.25 M  $Na_2S/0.35$  M  $Na_2SO_3$ , pH=12.9) and with aqueous (KOH/0.35 M  $Na_2SO_3$ , pH=12.9), respectively (**Figure S7**).

### Supplemental Figures

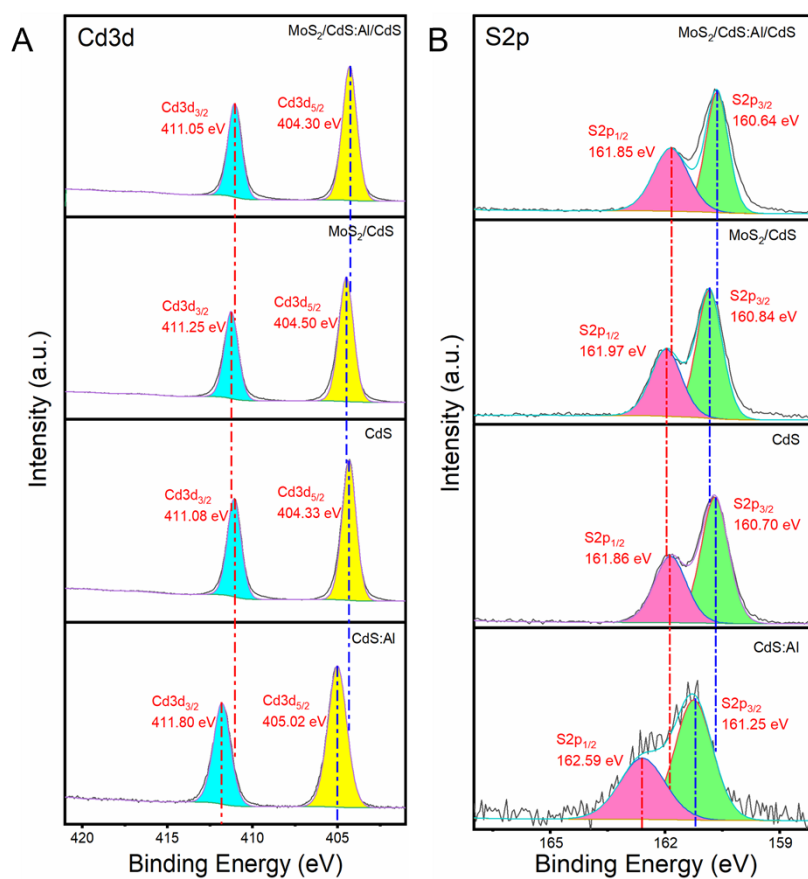

**Figure S1.** XPS Binding energy of Cd and S in different composition. (A) Cd3d (B) S2p

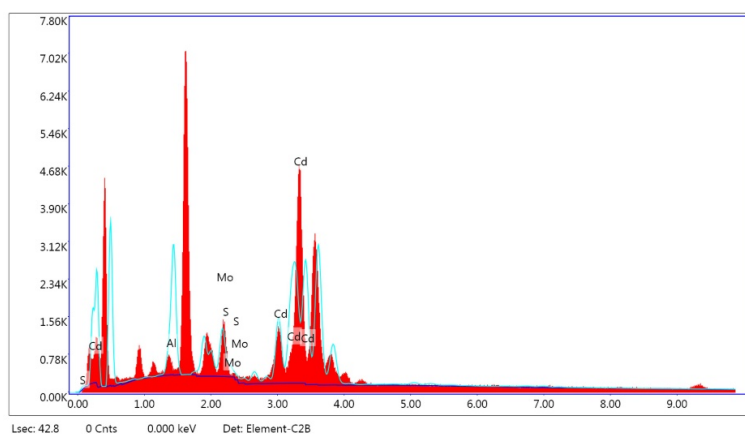

**Figure S2.** The elemental composition of MoS<sub>2</sub>/CdS:Al/CdS electrode analyzed by EDS.

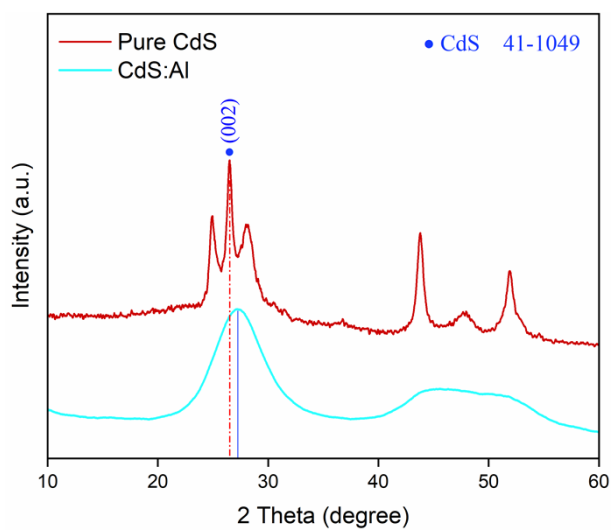

**Figure S3.** The PXRD patterns of the as-prepared of CdS:Al film.

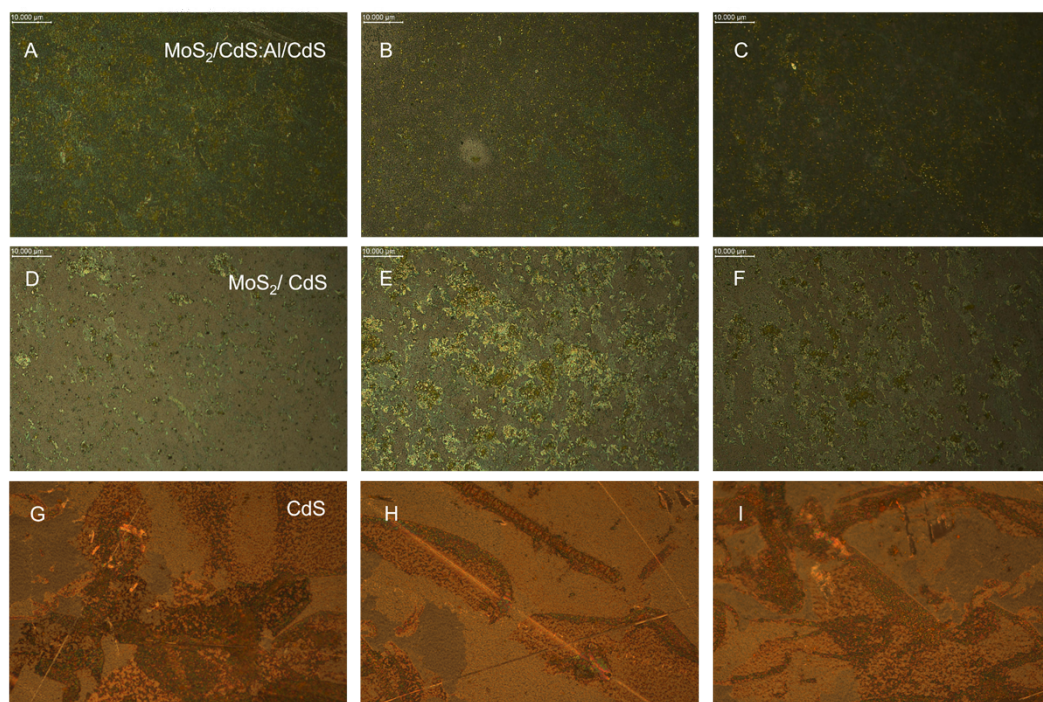

**Figure**

**re S4.** Optical microscope images of (A-C)  $\text{MoS}_2/\text{CdS:Al}/\text{CdS}$  films, (D-F)  $\text{MoS}_2/\text{CdS}$  films, (G-I) CdS films at 50 times magnification.

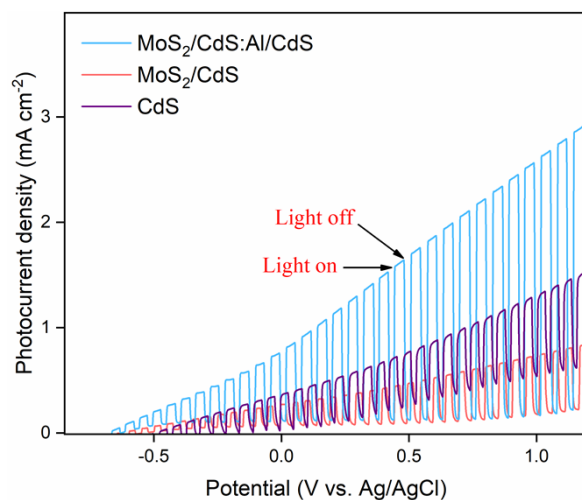

**Figure S5.** The LSV curves measured of CdS, MoS<sub>2</sub>/CdS and MoS<sub>2</sub>/CdS:Al/CdS with aqueous (KOH/Na<sub>2</sub>SO<sub>3</sub>) under chopped illumination.

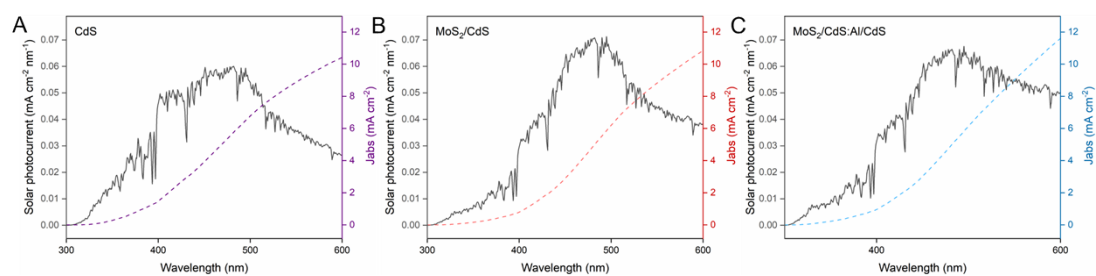

**Figure S6.**  $J_{\text{abs}}$  of (A) CdS; (B) MoS<sub>2</sub>/CdS; (C) MoS<sub>2</sub>/CdS:Al/CdS photoanodes (assuming 100% absorbed photo-to-current conversion efficiency for photons).

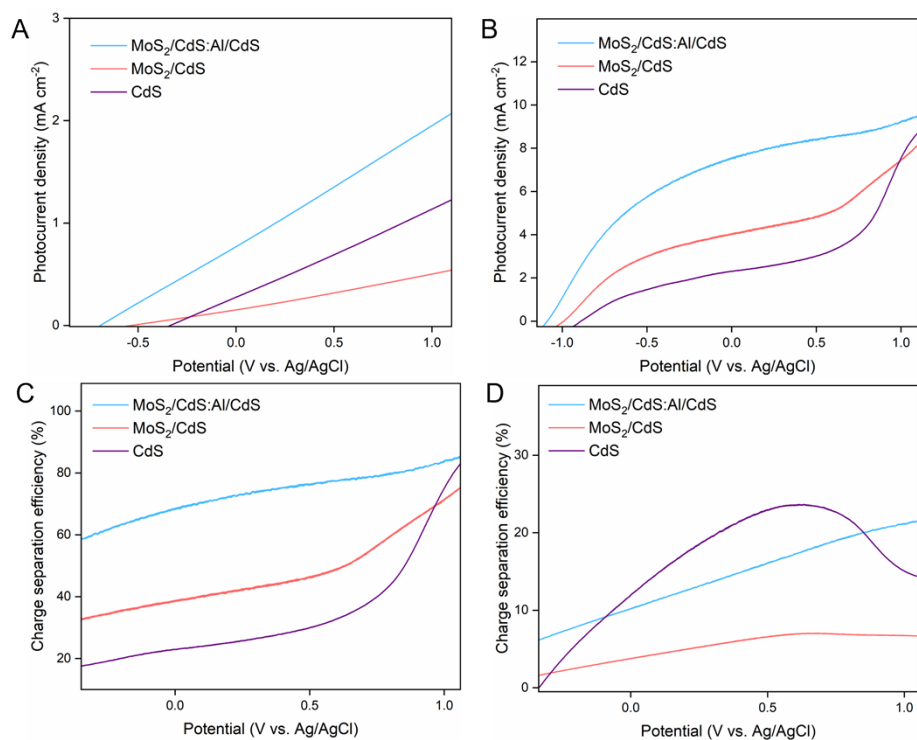

**Figure S7.** (A) LSV plots measured with aqueous (KOH/Na<sub>2</sub>SO<sub>3</sub>) and (B) LSV plots measured with aqueous (Na<sub>2</sub>S/Na<sub>2</sub>SO<sub>3</sub>); (C) bulk charge separation efficiency ( $\eta_{\text{sep}}$ ) and (D) Surface charge injection efficiency ( $\eta_{\text{inj}}$ ) of the fabricated photoanodes.

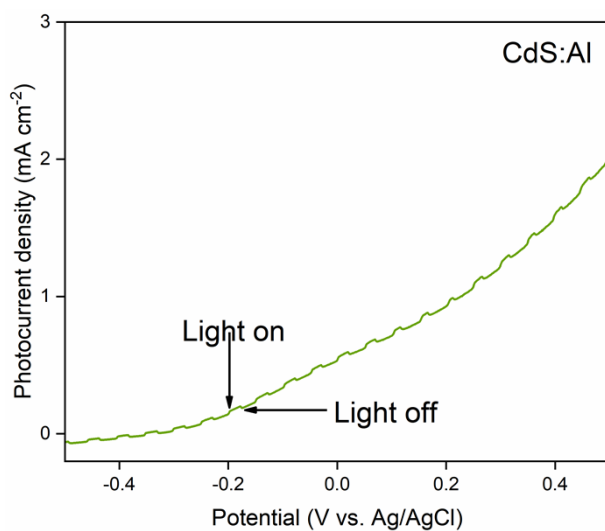

**Figure S8.** LSV test on CdS:Al film under chopped illumination.

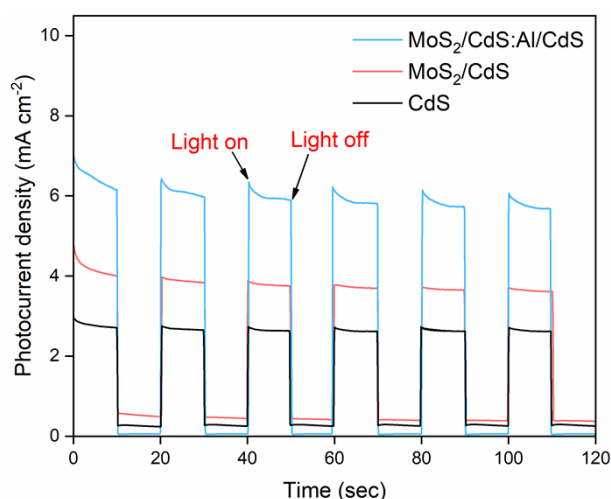

**Figure S9.** The I-T curves at a constant bias voltage (0.58 V vs.  $V_{Ag/AgCl}$ ) of CdS, MoS<sub>2</sub>/CdS and MoS<sub>2</sub>/CdS:Al/CdS.

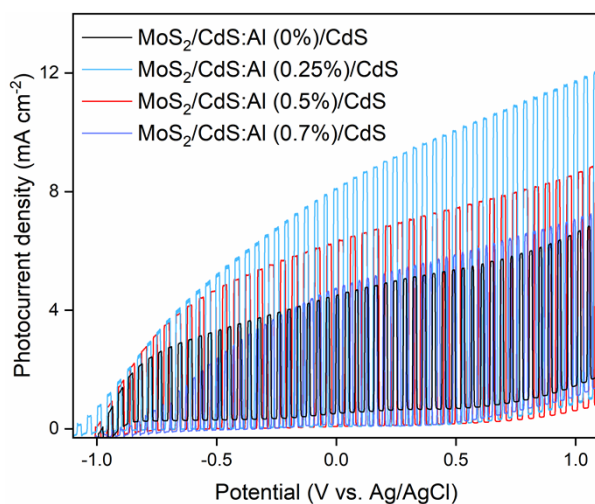

**Figure S10.** LSV under chopped illumination of the different atomic ratio of Al element in MoS<sub>2</sub>/CdS:Al/CdS, all the samples were prepared using 20 SILAR cycles, the default SILAR cycles of the CdS layer and the atomic ratio of Al in CdS:Al layer of MoS<sub>2</sub>/CdS:Al/CdS was set as 20 times and 0.25 at%, respectively.



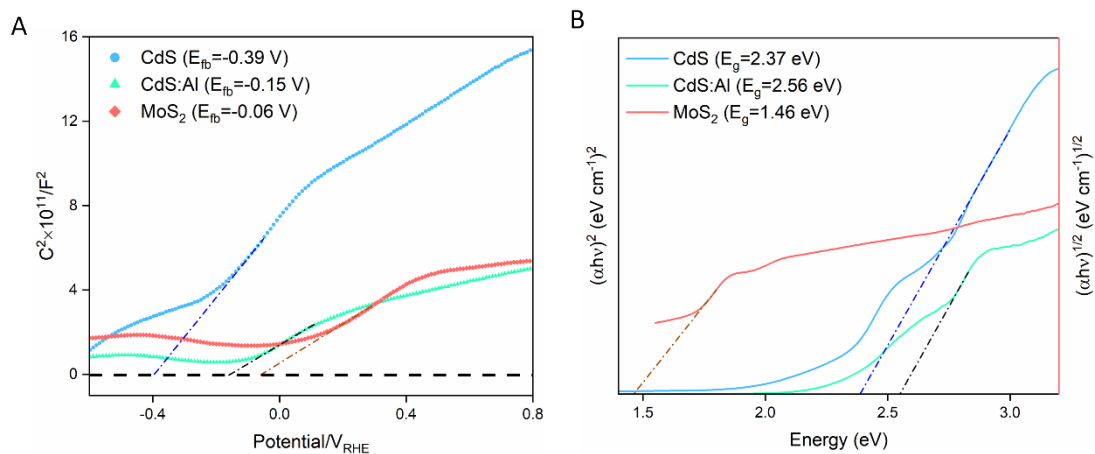

**Figure S11.** (A) Mott-Schottky plot of CdS, CdS:Al and MoS<sub>2</sub> in darkness; (B) The tauc-plot of CdS, CdS:Al and MoS<sub>2</sub>.

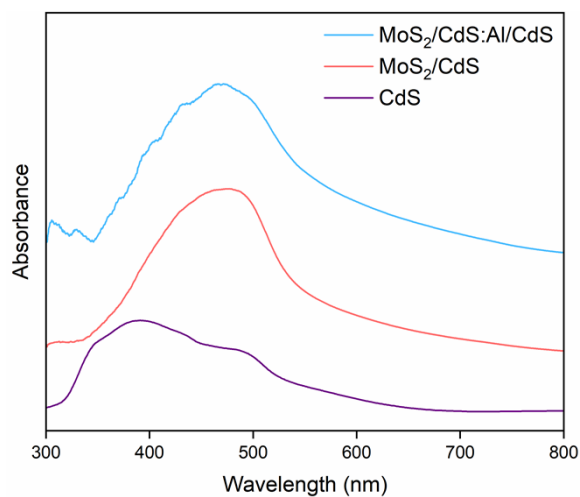

**Figure S12.** The absorbance spectra of MoS<sub>2</sub>/CdS:Al/CdS film, MoS<sub>2</sub>/CdS film and CdS film.

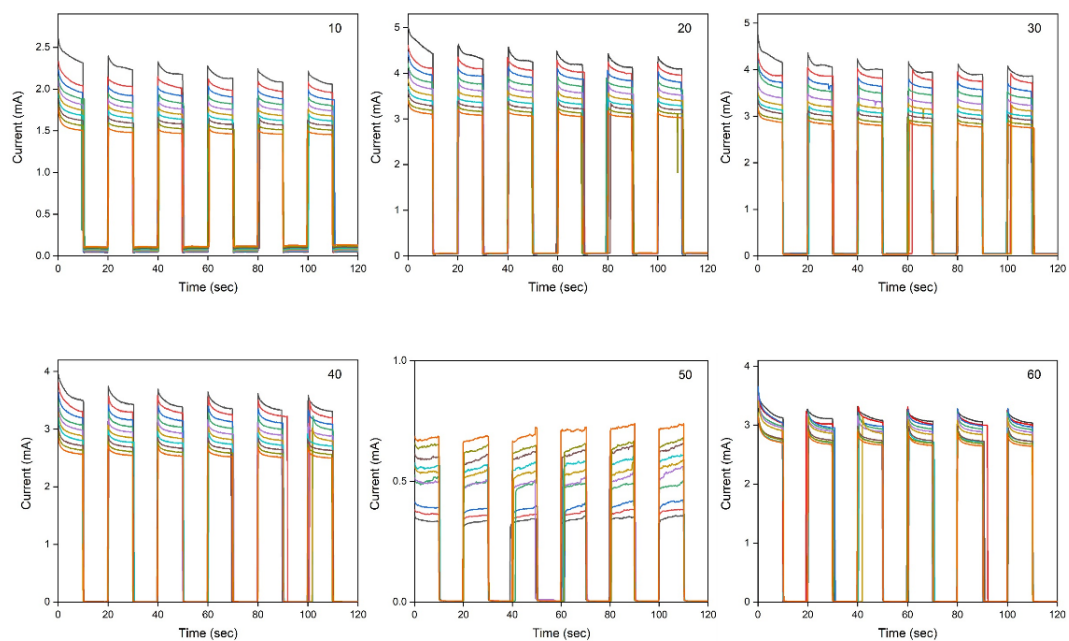

**Figure S13.** The chronoamperometry tests for 10-60 SILAR cycles over the  $\text{MoS}_2/\text{CdS}:\text{Al}/\text{CdS}$  samples.

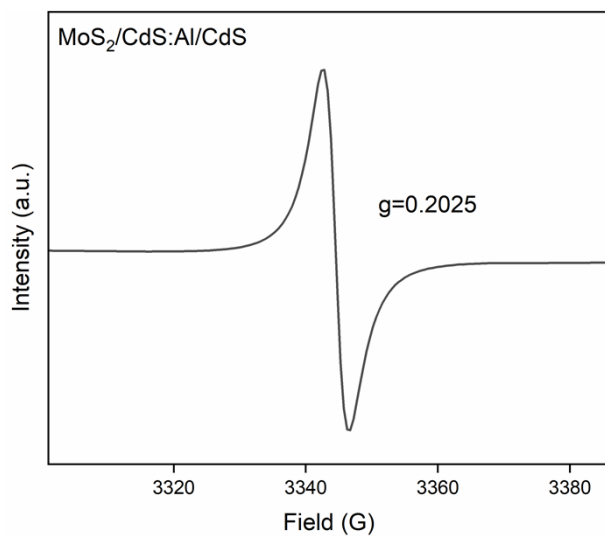

**Figure S14.** EPR spectra of  $\text{MoS}_2/\text{CdS}:\text{Al}/\text{CdS}$  after 5 min illumination.

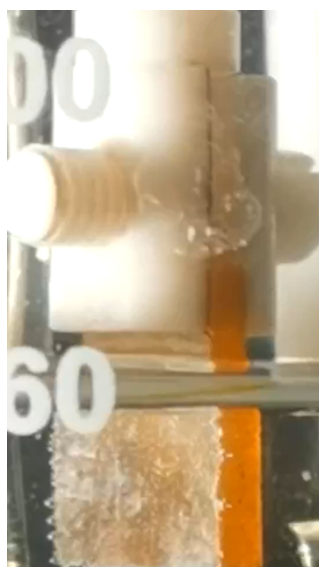

**Video S1.** Hydrogen production video of MoS<sub>2</sub>/CdS:Al/CdS films.

## References

1. L. Li, H. Zhang, C. Liu, P. Liang, N. Mitsuzaki and Z. Chen, *Journal of Materials Science*, 2018, **54**, 659-670.
2. A. Kudo and Y. Miseki, *Chemical Society Reviews*, 2009, **38**, 253-278.
